# Supplementary material
Source: publisher figshare collection journal article supplement (https://sage.figshare.com/ndownloader/files/18037949)
Supplement: Supplementary file 1 [file 18037949]

**Appendix 9.** Permutational multivariate analysis of variance post hoc test results. Differences in composition of VEAs among forest types (plot-based comparisons): semi-deciduous forest (**SDF**), tropical montane cloud forest (**TMCF**), submontane scrub (**SMS**), and the pine-oak forest (**POF**).

| pairs       | F.Model | R2   | p.value | p.adjusted |
|-------------|---------|------|---------|------------|
| TMCF vs POF | 14.4    | 0.43 | 0.003   | 0.018      |
| TMCF vs SMS | 33.1    | 0.63 | 0.001   | 0.006      |
| TMCF vs SDF | 64.17   | 0.78 | 0.001   | 0.006      |
| POF vs SMS  | 23.92   | 0.70 | 0.003   | 0.018      |
| POF vs SDF  | 978.3   | 0.99 | 0.002   | 0.012      |
| SMS vs SDF  | 38.76   | 0.81 | 0.002   | 0.006      |
